# Supplementary material for: Japanese founder duplications/triplications involving BHLHA9 are associated with split-hand/foot malformation with or without long bone deficiency and Gollop-Wolfgang complex
Source: PubMed Central journal article supplement (PMC4205278; doi:10.1186/s13023-014-0125-5), 2014-10-21
Supplement: 13023_2014_125_MOESM1_ESM.pdf [file 13023_2014_125_MOESM1_ESM.pdf]

Table S1 Primers utilized in this study.

|                          |                          | Forward (5'→3')                   | Reverse (5'→3')                    | AT                   | PS    | Reference   |
|--------------------------|--------------------------|-----------------------------------|------------------------------------|----------------------|-------|-------------|
| <i>DLX5</i> sequencing   | Exon 1-1                 | CCCAGACATCAGAGCCTT                | GCTGAAGACTCGGGCAAAGT               | 60                   | 651   | This report |
|                          | Exon 1-2                 | GTTTGACAGAAGGGTCCCA               | CTCCACAGGGCTCTCCTACT               | 60                   | 545   | This report |
|                          | Exon 2                   | CTATTTGAGGCCCTTCCGCA              | CTTGCTTTCAACCCGCGAAA               | 65                   | 542   | This report |
|                          | Exon 3                   | CCCAGAGGTCCGAAGATGC               | TGCCTTGTGGATCTCTGCA                | 63                   | 875   | This report |
| <i>TP63</i> sequencing   | Exon 1                   | TCCCGGCTTATATCTATATATA            | GACACATTCATAATACACAAGGCAC          | 60                   | 220   | 1           |
|                          | Exon 2                   | TCCACTTGGGTTTTCATGATAGAG          | GTAAGCAATATTTTGACCACCCAC           | 60                   | 300   | 1           |
|                          | Exon 3                   | GCTTTAGTAAACAACAGCATG             | GAAAAGACAGGTTTAAACAGAGC            | 60                   | 281   | 1           |
|                          | Exon 3-1                 | GAGAGAGAGGGACTTGAGTTCTG           | GACCGAGAACCAGCAAATACG              | 60                   | 261   | 1           |
|                          | Exon 4                   | GGCTAATATTGGGGTTTCTGG             | GGGGTCAGGTATGTGCGT                 | 60                   | 321   | 1           |
|                          | Exon 5                   | CCTGTTGGTTCTCTCCTTCCT             | TCAAACAAAATGCCACAG                 | 60                   | 306   | 1           |
|                          | Exon 6                   | CCACCAACATCCTGTTTCATGC            | GTCTACTCAGTCCATAGAGGTGTTG          | 60                   | 257   | 1           |
|                          | Exon 7                   | GAAGGAACAACGTCAGTTAAACCC          | AAAGCAGCCACGATTTCACTTTGCC          | 60                   | 245   | 1           |
|                          | Exon 8                   | GTGGTAGATCTTCAGGGGACTTTC          | CCAACATCTGGAGAAGATTC               | 60                   | 263   | 1           |
|                          | Exon 9                   | GCTTTAGAAGTGTTCAGG                | ACACCTCCTTTCCCATTGTC               | 60                   | 237   | 1           |
|                          | Exon 10                  | TGAGGATTGACCACACTTCTAAC           | CATCAATCACCTATTGTCTGATC            | 60                   | 287   | 1           |
|                          | Exon 11                  | TGCTCACCATTATTTCCATGTTTGTG        | TCACAGAGTCTTGTCTTAAGC              | 60                   | 257   | 1           |
|                          | Exon 12                  | GGACTATAACAGTATCCGCCC             | CAAGATGGACCACTGGGATG               | 60                   | 294   | 1           |
|                          | Exon 13                  | CTTATCTCGCCAATGCAGTTGG            | AACTACAAGGCGGTTGTCTATCAG           | 60                   | 241   | 1           |
|                          | Exon 14                  | GGGAATGATAGGATGCTGTGG             | AAGATTAAGCAGGAGTGCTT               | 60                   | 449   | 1           |
| Exon 15                  | GATGAAGTCCTAGGCCTTC      | GGAAATACAACACACACT                | 60                                 | 205                  | 1     |             |
| <i>WNT10B</i> sequencing | Exon 2                   | GTGTCTGATTGGGCAAGGTT              | CTCATTGCTTAGAGCCCTGG               | 60                   | 491   | 1           |
|                          | Exon 3                   | GGAGAGTTGGAGGGGTCTG               | GAAACCATCCCTTCCCGC                 | 64                   | 405   | 1           |
|                          | Exon 4                   | TGCCTGTCAACCTTACCTCC              | TAACCAGGCCTAAAAGCTG                | 60                   | 470   | 1           |
|                          | Exon 5                   | TGTGCCTCTGTGTTCTGTCC              | GAAATCAGAGCAAAGGGCTG               | 60                   | 598   | 1           |
|                          | <i>BHLHA9</i> sequencing | Exon 1-1                          | AGAGGGCAGAGGGCAGAG                 | CGTGGCACTCCAGGTGTC   | 65    | 469         |
| Exon 1-2                 |                          | CAAGAGGCTCTCCAAGATCG              | CCAAGACGCCTTTGCAGT                 | 60                   | 498   | This report |
| Exon 1-3                 |                          | GGCTGGCAGCTGGACTATAA              | AGGATCCTGAGCCTTTCTGG               | 60                   | 235   | This report |
| 7,406 bp sequencing      |                          | CGTGATTCTCCACTGTTACCTGTTTGTTCCTT  | CCACATATAAGTCATCTTGGAGAATGGACACGAT | 66                   | 7,406 | This report |
| FISH probe               |                          | CAGAAGTAAATACATACACTCTGCTTCTAATGC | ATCCAAGTTGAGATGTAATAACACACAAGACAT  | 66                   | 8259  | This report |
| Fusion point analysis    | P1/P2                    | TCATTGTATGGTAATAGCCTAGACACAGATCC  | CCGATATCGTGTGTTTATAGTGTTCCTG       | 66                   | 2195  | This report |
|                          | P3/P4                    | AATGTGGTTGAGACCCAGGC              | CACACTGGATGGGAAGGACC               | 60                   | 418   | This report |
|                          | P5/P6                    | CTCAGCCAGGTGAAGAGGAC              | CGAGGATCCTTTGTTTGTCT               | 60                   | 214   | This report |
|                          | RNaseP                   | CCTGGTACATGCCACTGATG              | AGTGTAGAGGGCAAGCCAGA               | 60                   | 213   | 2           |
|                          | Microsatellite analysis  | <i>D17S1174</i>                   | AGGGGAATCGCTTAAACCC                | TTGGAGACATGGCAGGGAAC | 60    | 387         |
| Southern blot analysis   | Probe 1                  | GACGGATAACAAGGACCGTG              | TTTGGAGAGTTGATACAGCG               | 58                   | 611   | This report |
|                          | Probe 2                  | CTTATCCAGAGCCTACACAAC             | CCTTTTCTGGAGAATACTC                | 55                   | 241   | This report |
|                          | Probe 3                  | CACTCTGCTTCTAATGCC                | TTTTGGTTGGGCTGACTC                 | 58                   | 504   | This report |
|                          | Probe 4                  | AGGCTGTGACACAGACCAC               | GCCCCCTTACTTCTTTCAG                | 58                   | 447   | This report |
|                          | Probe 5                  | GTCAGGAGGCTACTCTCAC               | AGAGTAGCCCTGGCACGAG                | 58                   | 533   |             |
| Methylation analysis     |                          | CCTGGGAGAGAAGGAGGCTCAGG           | TGGGCATTTTCTTTGCTTTTACTGACC        | 514                  |       | This report |
| Mouse expression study   |                          | CAAGAGGCTCTCCAAGATCG              | CAGCATATGCCCTCAGATCA               |                      |       | This report |

AT: annealing temperature (°C); and PS: product size (bp).

## References

- Ugur SA et al.: Hum Mol Genet 2008, **17**:2644–2653.
- Wu X et al.: Breast Cancer Res 2012, **14**: R73.
