# Supplementary material for: Japanese founder duplications/triplications involving BHLHA9 are associated with split-hand/foot malformation with or without long bone deficiency and Gollop-Wolfgang complex
Source: PubMed Central journal article supplement (PMC4205278; doi:10.1186/s13023-014-0125-5), 2014-10-21
Supplement: 13023_2014_125_MOESM7_ESM.pdf [file 13023_2014_125_MOESM7_ESM.pdf]

Table S4 Polymorphism analysis of rs3951819 (A/G SNP) in *BHLHA9*

|                      | Polymorphism analysis |                |                 |              |                    | Statistical analysis ( <i>P</i> -value) |                          |      |       |
|----------------------|-----------------------|----------------|-----------------|--------------|--------------------|-----------------------------------------|--------------------------|------|-------|
|                      | Patients              |                |                 |              | Carriers<br>(n=17) | SHFM<br>vs.<br>SHFLD                    | Carriers vs.<br>Patients |      |       |
|                      | Total<br>(n=27)       | SHFM<br>(n=15) | SHFLD<br>(n=10) | GWC<br>(n=2) |                    |                                         | Total                    | SHFM | SHFLD |
| <Allele frequency*>  |                       |                |                 |              |                    |                                         |                          |      |       |
| A                    | 16                    | 7              | 7               | 2            | 11                 | 0.23                                    | 0.49                     | 0.25 | 0.56  |
| G                    | 11                    | 8              | 3               | 0            | 6                  |                                         |                          |      |       |
| <Genotype frequency> |                       |                |                 |              |                    |                                         |                          |      |       |
| AA/A                 | 6                     | 4              | 1               | 1            | 4                  | ...                                     | ...                      | ...  | ...   |
| AA/G                 | 2                     | 2              | 0               | 0            | 3                  | ...                                     | ...                      | ...  | ...   |
| AG/A                 | 5                     | 2              | 3               | 0            | 1                  | ...                                     | ...                      | ...  | ...   |
| AG/G                 | 5                     | 4              | 1               | 0            | 3                  | ...                                     | ...                      | ...  | ...   |
| AAA/A                | 4                     | 0              | 3               | 1            | 4                  | ...                                     | ...                      | ...  | ...   |
| AAA/G                | 1                     | 0              | 1               | 0            | 0                  | ...                                     | ...                      | ...  | ...   |
| AAG/A                | 0                     | 0              | 0               | 0            | 2                  | ...                                     | ...                      | ...  | ...   |
| AAG/G                | 2                     | 1              | 1               | 0            | 0                  | ...                                     | ...                      | ...  | ...   |
| AGA/A                | 0                     | 0              | 0               | 0            | 0                  | ...                                     | ...                      | ...  | ...   |
| AGA/G                | 0                     | 0              | 0               | 0            | 0                  | ...                                     | ...                      | ...  | ...   |
| AGG/A                | 1                     | 1              | 0               | 0            | 0                  | ...                                     | ...                      | ...  | ...   |
| AGG/G                | 1                     | 1              | 0               | 0            | 0                  | ...                                     | ...                      | ...  | ...   |

\* On the duplications/triplications negative normal chromosome 17.

The 95% confidence intervals for odds ratios include 1.0 in all the comparisons (not shown).

*P*-values have not been calculated for GWC, because of the small patient number.

The allele frequency in the Japanese population is 60% for A and 40% for G
