# Supplementary material for: Japanese founder duplications/triplications involving BHLHA9 are associated with split-hand/foot malformation with or without long bone deficiency and Gollop-Wolfgang complex
Source: PubMed Central journal article supplement (PMC4205278; doi:10.1186/s13023-014-0125-5), 2014-10-21
Supplement: 13023_2014_125_MOESM8_ESM.pdf [file 13023_2014_125_MOESM8_ESM.pdf]

Table S5 Polymorphism analysis of rs34201045 (4 bp insertion) in *TP63*

|                                          | Polymorphism analysis |                |                |              |                    | Statistical analysis ( <i>P</i> -value) |                          |      |       |
|------------------------------------------|-----------------------|----------------|----------------|--------------|--------------------|-----------------------------------------|--------------------------|------|-------|
|                                          | Patients              |                |                |              | Carriers<br>(n=15) | SHFM<br>vs.<br>SHFLD                    | Carriers vs.<br>Patients |      |       |
|                                          | Total<br>(n=27)       | SHFM<br>(n=17) | SHFLD<br>(n=8) | GWC<br>(n=2) |                    |                                         | Total                    | SHFM | SHFLD |
| <Allele frequency>                       |                       |                |                |              |                    |                                         |                          |      |       |
| Insertion (-)                            | 23                    | 15             | 7              | 1            | 13                 | 0.61                                    | 0.62                     | 0.58 | 0.61  |
| Insertion (+)                            | 31                    | 19             | 9              | 3            | 17                 |                                         |                          |      |       |
| <Genotype frequency>                     |                       |                |                |              |                    |                                         |                          |      |       |
| Insertion (-)/(-)                        | 5                     | 3              | 2              | 0            | 2                  | 0.89                                    | 0.72                     | 0.73 | 0.96  |
| Insertion (-)/(+)                        | 13                    | 9              | 3              | 1            | 8                  |                                         |                          |      |       |
| Insertion (+)/(+)                        | 9                     | 5              | 3              | 1            | 3                  |                                         |                          |      |       |
| Insertion (-)/(-)                        | 5                     | 3              | 2              | 0            | 2                  | 0.62                                    | 0.59                     | 0.67 | 0.55  |
| Insertion (-)/(+) plus Insertion (+)/(+) | 22                    | 14             | 6              | 2            | 11                 |                                         |                          |      |       |
| Insertion (-)/(-) plus Insertion (-)/(+) | 18                    | 12             | 5              | 1            | 10                 | 0.68                                    | 0.39                     | 0.43 | 0.48  |
| Insertion (+)/(+)                        | 9                     | 5              | 3              | 1            | 3                  |                                         |                          |      |       |

The genotyping data satisfy the Hardy-Weinberg equilibrium (Fisher's exact test with one degree of freedom).

The (+) and the (-) symbols represent the presence and absence of the 4 bp insertion, respectively.

The 95% confidence intervals for odds ratios include 1.0 in all the comparisons (not shown).

*P*-values have not been calculated for GWC, because of the small patient number.

The allele frequency in 100 Japanese control subjects is 44% for Insertion (-) and 56% for Insertion (+) (our data).
