# Supplementary material for: Japanese founder duplications/triplications involving BHLHA9 are associated with split-hand/foot malformation with or without long bone deficiency and Gollop-Wolfgang complex
Source: Springer Nature journal article supplement (doi:10.1186/s13023-014-0125-5), 2014-10-17
Supplement: MOESM2 [file 9775824]

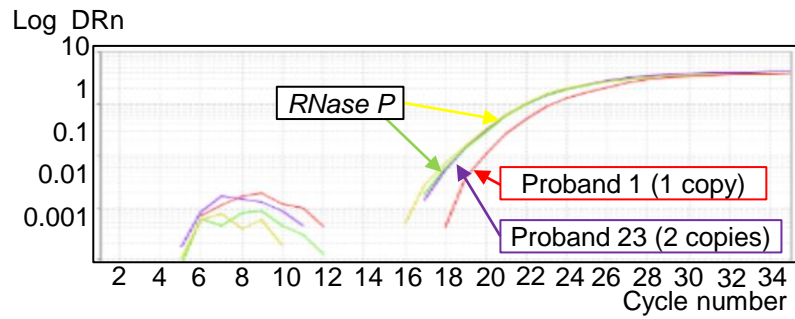

**Figure S1.** Real-time PCR analysis. Shown are the raw data indicating the presence of a single copy and two copies of the fusion point in the proband 1 and the proband 23, respectively. *RNaseP* has been utilized as an internal control.
