# Supplementary material for: Japanese founder duplications/triplications involving BHLHA9 are associated with split-hand/foot malformation with or without long bone deficiency and Gollop-Wolfgang complex
Source: Springer Nature journal article supplement (doi:10.1186/s13023-014-0125-5), 2014-10-17
Supplement: MOESM4 [file 9775824]

Table S2 *In silico* analysis for specific structures around the breakpoint-flanking regions and control regions

|                                                          | Centomeric breakpoint<br>( <i>YWHAE</i> intron 1) | Telomeric breakpoint<br>( <i>ABR</i> intron 1) | Control regions (ch. 17)<br>(n =48) |
|----------------------------------------------------------|---------------------------------------------------|------------------------------------------------|-------------------------------------|
| GC content (%)                                           | 41.0                                              | 60.5                                           | 44.8                                |
| Palindrome                                               | 1                                                 | 0                                              | 0.21                                |
| Non-B (non-canonical) DNA structure                      |                                                   |                                                |                                     |
| Direct repeat                                            | 3                                                 | 0                                              | 0.23                                |
| Inverted repeat, cruciform motif                         | 3                                                 | 0                                              | 1.67                                |
| Mirror repeat                                            | 5                                                 | 0                                              | 0.33                                |
| A-phased repeat                                          | 0                                                 | 0                                              | 0.14                                |
| G-quadruplex repeat                                      | 0                                                 | 0                                              | 0.10                                |
| Short tandem repeat                                      | 4                                                 | 0                                              | 0.71                                |
| Z-DNA motif                                              | 0                                                 | 0                                              | 0.10                                |
| Rearrangement-associated sequence motif                  |                                                   |                                                |                                     |
| Homologous recombination hotspot motif (CCNCCNTNNCCNC)   | 0                                                 | 0                                              | 0.06                                |
| DNA polymerase A frameshift hotspot 1 (TCCCCC)           | 0                                                 | 0                                              | 0.46                                |
| DNA polymerase B frameshift hotspot 1 (ACCCWR)           | 1                                                 | 1                                              | 1.40                                |
| Translin binding site 2 (GCCCWSSW)                       | 1                                                 | 3                                              | 0.65                                |
| Consensus scaffold attachment region 4 (TWWTDTTWWW)      | 0                                                 | 0                                              | 3.67                                |
| Murine parvovirus recombination hotspot (CTWTTY)         | 7                                                 | 2                                              | 2.31                                |
| Murine MHC recombination hotspot (GAGRCAGR)              | 0                                                 | 0                                              | 0.81                                |
| Duplication-associated motif (CTSAGYTTTT)                | 0                                                 | 1                                              | 0.02                                |
| Duplication-associated motif (WSCAGGNAYWWTTCC)           | 0                                                 | 0                                              | 0                                   |
| Duplication-associated motif (ATTTCTYCAGYNYTGGATHT)      | 0                                                 | 0                                              | 0                                   |
| Rearrangement-associated tri/tetranucleotide             |                                                   |                                                |                                     |
| Minimal primase recognition site of prokaryote (CTG/CAG) | 28                                                | 39                                             | 29.25                               |
| Recombination-associated tetranucleotide (CCTG)          | 7                                                 | 14                                             | 8.75                                |

Except for CG content, the number of each motif is shown for the centromeric and the telomeric breakpoints of 600 bp long.

For control regions, the mean number of each motif is shown.
