# Supplementary material for: Japanese founder duplications/triplications involving BHLHA9 are associated with split-hand/foot malformation with or without long bone deficiency and Gollop-Wolfgang complex
Source: Springer Nature journal article supplement (doi:10.1186/s13023-014-0125-5), 2014-10-17
Supplement: MOESM5 [file 9775824]

Table S3 Phenotypes in patients/subjects with increased copy number of *BHLHA9*

| Patient |         |     | Ectrodactyly |      | Long bone deficiency |       | Phenotype |
|---------|---------|-----|--------------|------|----------------------|-------|-----------|
| Family  | Subject | Sex | Hands        | Feet | Tibia                | Femur |           |
| 1       | II-1    | M   | +/+          | +/+  | +/+                  | +/-   | GWC       |
| 2       | II-1    | F   | +/+          | +/-  | +/-                  | -/-   | SHFLD     |
|         | II-2    | M   | +/+          | +/+  | +/+                  | -/-   | SHFLD     |
| 3       | I-1     | M   | -/+          | -/-  | +/-                  | -/-   | SHFLD     |
|         | II-2    | F   | +/+          | -/+  | -/-                  | -/-   | SHFM      |
|         | II-3    | F   | +/-          | -/-  | -/-                  | -/-   | SHFM      |
| 4       | II-1    | M   | +/-          | -/-  | +/-                  | -/-   | SHFLD     |
| 5       | II-1    | F   | -/+          | -/-  | -/+                  | -/-   | SHFLD     |
| 6       | II-1    | M   | +/-          | +/+  | +/+                  | -/-   | SHFLD     |
| 7       | II-1    | M   | +/-          | -/+  | -/-                  | -/-   | SHFM      |
|         | II-3    | F   | +/-          | -/-  | -/-                  | -/-   | SHFM      |
|         | III-2   | M   | +/+          | -/-  | -/-                  | -/-   | SHFM      |
|         | IV-1    | F   | +/+          | -/-  | -/-                  | -/-   | SHFM      |
| 8       | I-1     | M   | +/-          | +/-  | -/-                  | -/-   | SHFM      |
|         | II-1    | M   | +/-          | +/-  | -/-                  | -/-   | SHFM      |
| 9       | I-1     | M   | +/+          | -/-  | -/-                  | -/-   | SHFM      |
|         | II-2    | M   | +/+          | -/-  | -/-                  | -/-   | SHFM      |
| 10      | I-2     | F   | +/+          | -/-  | -/-                  | -/-   | SHFM      |
|         | II-1    | F   | +/-          | -/-  | -/-                  | -/-   | SHFM      |
|         | II-2    | F   | -/+          | -/-  | -/-                  | -/-   | SHFM      |
| 11      | II-1    | F   | +/-          | -/-  | -/-                  | -/-   | SHFM      |
| 12      | II-1    | M   | +/-          | -/-  | -/-                  | -/-   | SHFM      |
|         | II-3    | M   | -/+          | -/-  | -/-                  | -/-   | SHFM      |
| 13      | II-3    | F   | +/+          | -/-  | -/-                  | -/-   | SHFM      |
| 14      | II-1    | M   | -/+          | -/-  | -/-                  | -/-   | SHFM      |
| 15      | II-2    | M   | +/-          | -/-  | -/-                  | -/-   | SHFM      |
| 16      | II-3    | M   | +/-          | -/-  | -/-                  | -/-   | SHFM      |
| 17      | II-2    | F   | +/-          | -/-  | -/-                  | -/-   | SHFM      |
| 18      | II-1    | M   | +/+          | +/+  | -/-                  | -/-   | SHFM      |
| 19      | II-2    | F   | +/+          | -/-  | -/-                  | -/-   | SHFM      |
| 20      | II-1    | M   | +/+          | +/-  | -/-                  | -/-   | SHFM      |
| 21      | II-1    | F   | +/+          | -/-  | -/-                  | -/-   | SHFM      |
| 22      | II-1    | M   | +/+          | -/-  | -/-                  | -/-   | SHFM      |
| 23      | II-1    | M   | -/-          | +/-  | +/+                  | +/-   | GWC       |
|         | II-2    | M   | +/+          | +/-  | +/-                  | -/-   | SHFLD     |
| 24      | II-1    | M   | +/-          | +/-  | +/-                  | -/-   | SHFLD     |
|         | III-1   | M   | +/+          | +/-  | +/+                  | -/-   | SHFLD     |
| 25      | III-1   | M   | +/+          | +/+  | +/+                  | -/-   | SHFLD     |
|         | III-2   | F   | +/+          | -/-  | -/-                  | -/-   | SHFM      |
| 26      | II-2    | M   | -/+          | -/-  | +/+                  | -/-   | SHFLD     |
| 27      | I-2     | F   | +/+          | +/+  | -/-                  | -/-   | SHFM      |
|         | II-3    | M   | -/+          | -/+  | -/-                  | -/-   | SHFM      |

Right/Left.

Patient numbers correspond to those of Fig. 1.

Patient 3-II-2 has ventricular septal defect and aortic coarctation.

Patient 13-II-1 has hypospadias.

Patient 15-II-2 has polydactyly of the left foot.
